# Supplementary material
Source: Springer Nature journal article supplement (https://www.springermedizin.de/resource/supplementary/12985_2010_1008_MOESM13_ESM.pdf/9608936)

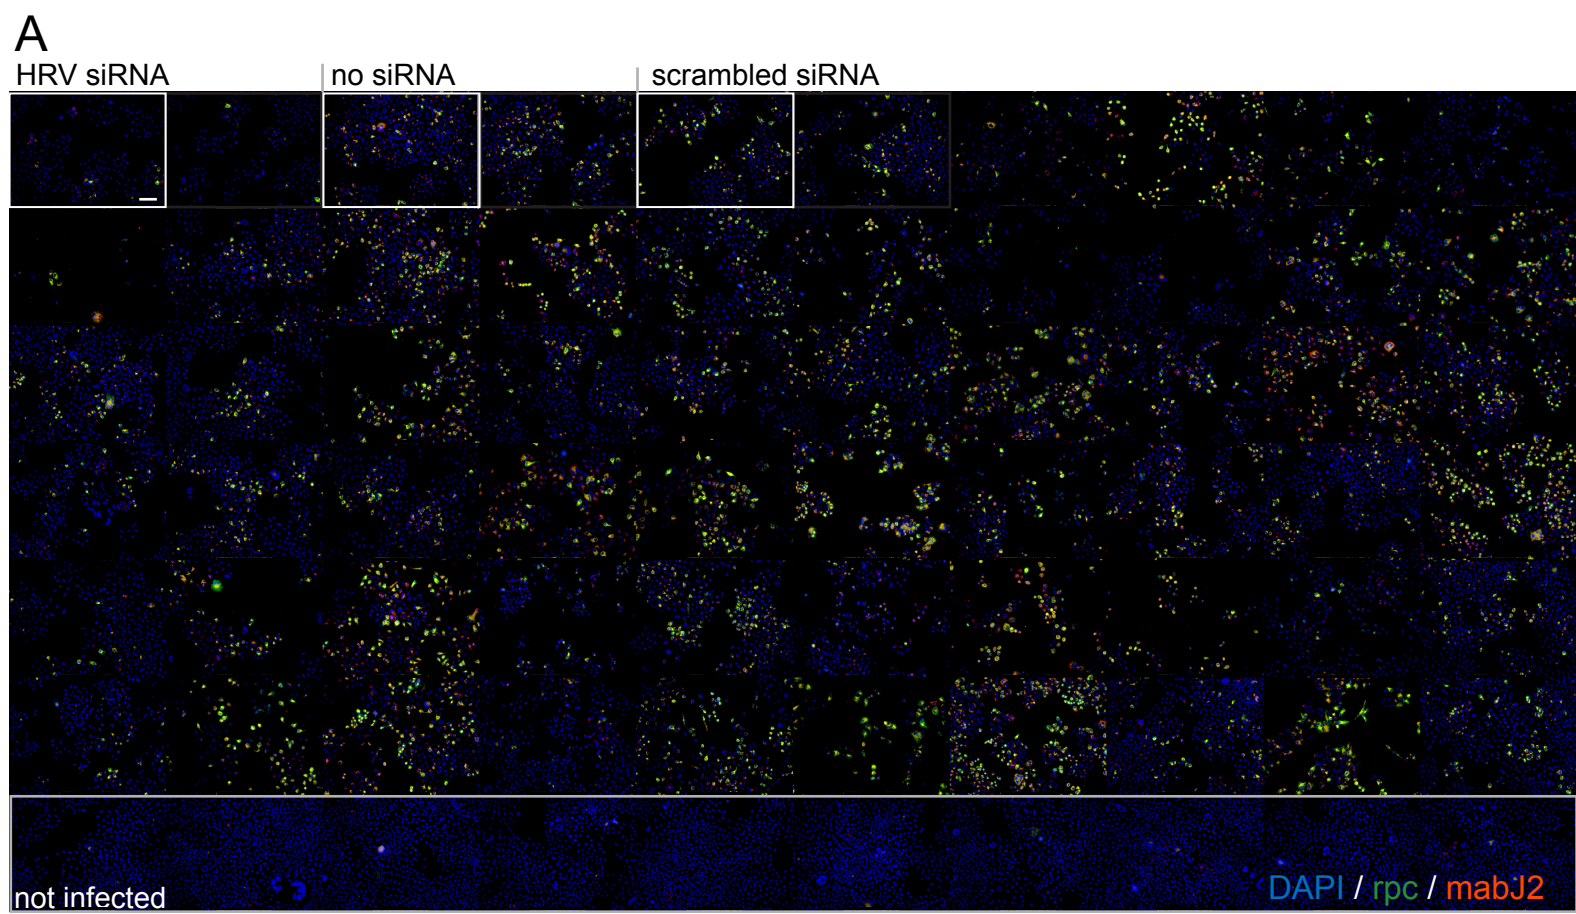

**B** zoom ins from A (white boxes)

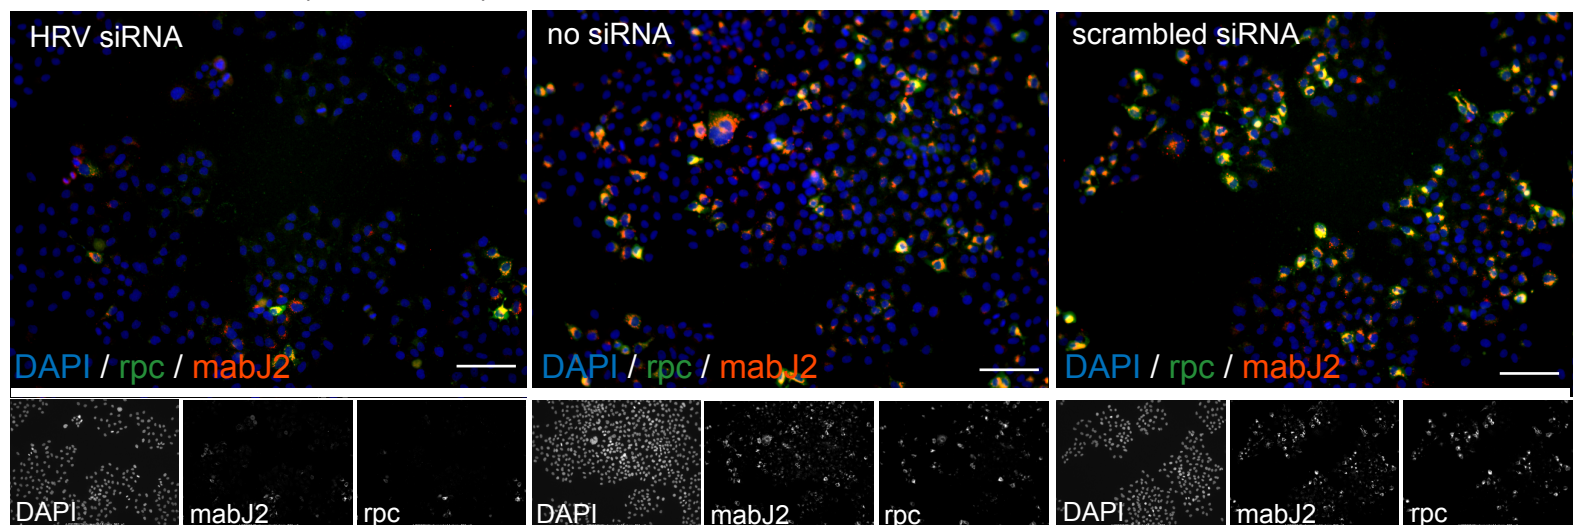

**C** Correlations of mabJ2 and mabR16-7 infection readouts for siRNA profiling

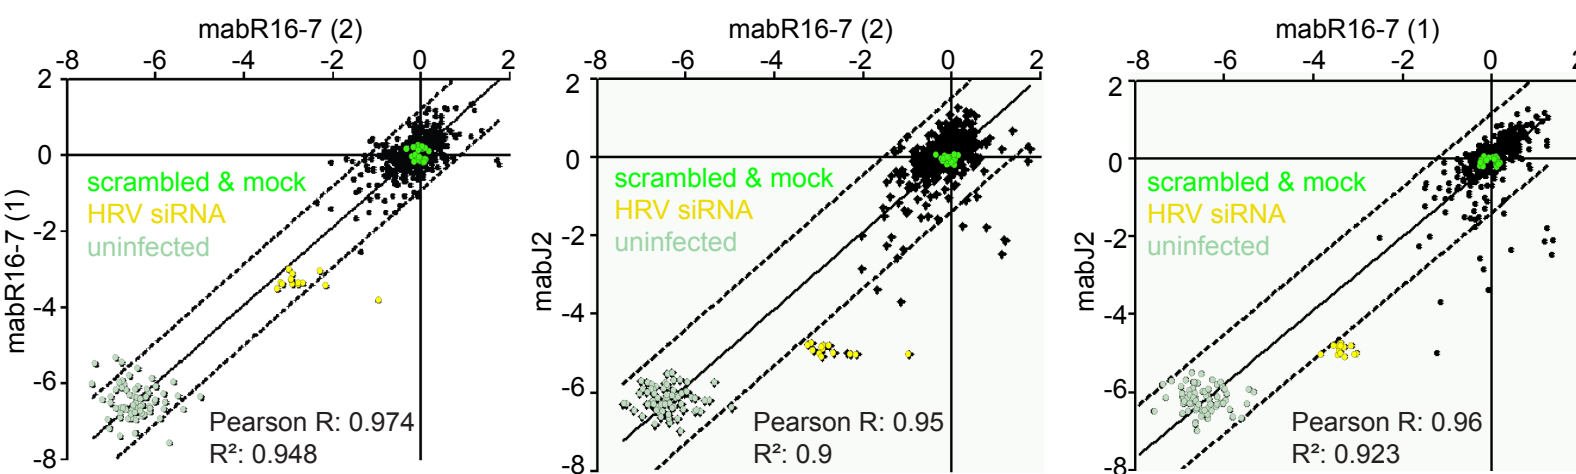

Supplement: MOESM13 [file 9608936]
